# Supplementary material
Source: PubMed Central journal article supplement (PMC5757248)
Supplement: NIHMS917447-supplement-supplement_1.pdf [file NIHMS917447-supplement-supplement_1.pdf]

**Supplemental Table 1: Risk of Incident Heart Failure Associated with Different Patterns of Myocardial Infarction in Subgroups**

| Subgroup                             |         | Events              |            | Model 1*         |                 | Model 2 <sup>†</sup> |                 | Interaction p-value <sup>††</sup> |
|--------------------------------------|---------|---------------------|------------|------------------|-----------------|----------------------|-----------------|-----------------------------------|
|                                      |         | Type                | N (%)      | HR (95%CI)       | P-value         | HR (95%CI)           | P-Value         |                                   |
| Age (year)                           | ≥ 53    | No MI (n=4611)      | 602 (13.1) | 1 (ref.)         | --              | 1 (ref.)             | --              | <.001                             |
|                                      |         | Silent MI (n=191)   | 37 (19.4)  | 1.52 (1.09-2.12) | <b>.014</b>     | 1.19 (0.85-1.66)     | .308            |                                   |
|                                      |         | Clinical MI (n=213) | 73 (34.3)  | 2.88 (2.25-3.69) | <b>&lt;.001</b> | 2.42 (1.89-3.11)     | <b>&lt;.001</b> |                                   |
|                                      | <53     | No MI (n=3996)      | 216 (5.4)  | 1 (ref.)         | --              | 1 (ref.)             | --              |                                   |
|                                      |         | Silent MI (n=114)   | 17 (14.9)  | 2.87 (1.75-4.70) | <b>&lt;.001</b> | 1.66 (1.00-2.75)     | .052            |                                   |
|                                      |         | Clinical MI (n=118) | 31 (26.3)  | 5.70 (3.85-8.44) | <b>&lt;.001</b> | 4.51 (3.04-6.68)     | <b>&lt;.001</b> |                                   |
| Sex                                  | Men     | No MI (n=3,544)     | 359 (10.1) | 1 (ref.)         | --              | 1 (ref.)             | --              | 0.093                             |
|                                      |         | Silent MI (n=172)   | 29 (16.9)  | 1.64 (1.12-2.40) | <b>.011</b>     | 1.19 (0.81-1.74)     | .396            |                                   |
|                                      |         | Clinical MI (n=244) | 68 (27.9)  | 2.90 (2.23-3.76) | <b>&lt;.001</b> | 2.54 (1.95-3.29)     | <b>&lt;.001</b> |                                   |
|                                      | Women   | No MI (n=5,063)     | 585 (8.6)  | 1 (ref.)         | --              | 1 (ref.)             | --              |                                   |
|                                      |         | Silent MI (n=133)   | 39 (16.5)  | 2.13 (1.42-3.18) | <b>&lt;.001</b> | 1.57 (1.05-2.35)     | .029            |                                   |
|                                      |         | Clinical MI (n=87)  | 89 (31.5)  | 5.17 (3.68-7.27) | <b>&lt;.001</b> | 3.64 (2.58-5.14)     | <b>&lt;.001</b> |                                   |
| Race                                 | White   | No MI (n=6,836)     | 585 (8.6)  | 1 (ref.)         | --              | 1 (ref.)             | --              | 0.304                             |
|                                      |         | Silent MI (n=236)   | 39 (16.5)  | 1.82 (1.32-2.52) | <b>&lt;.001</b> | 1.44 (1.04-2.00)     | <b>.028</b>     |                                   |
|                                      |         | Clinical MI (n=283) | 89 (31.5)  | 3.68 (2.93-4.63) | <b>&lt;.001</b> | 2.95 (2.35-3.71)     | <b>&lt;.001</b> |                                   |
|                                      | Black   | No MI (n=1,771)     | 233 (13.2) | 1 (ref.)         | --              | 1 (ref.)             | --              |                                   |
|                                      |         | Silent MI (n=69)    | 15 (21.7)  | 1.85 (1.09-3.13) | <b>.022</b>     | 1.11 (0.64-1.90)     | .719            |                                   |
|                                      |         | Clinical MI (n=48)  | 15 (31.3)  | 2.62 (1.54-4.46) | <b>&lt;.001</b> | 2.32 (1.35-3.97)     | <b>.002</b>     |                                   |
| Diabetes                             | Present | No MI (n=620)       | 160 (25.8) | 1 (ref.)         | --              | 1 (ref.)             | --              | .243                              |
|                                      |         | Silent MI (n=51)    | 17 (33.3)  | 1.58 (0.95-2.61) | .077            | 1.37 (0.82-2.30)     | .232            |                                   |
|                                      |         | Clinical MI (n=48)  | 22 (45.8)  | 2.62 (1.65-4.16) | <b>&lt;.001</b> | 2.71 (1.71-4.31)     | <b>&lt;.001</b> |                                   |
|                                      | Absent  | No MI (n=7925)      | 646 (8.2)  | 1 (ref.)         | --              | 1 (ref.)             | --              |                                   |
|                                      |         | Silent MI (n=254)   | 37 (14.6)  | 1.71 (1.23-2.38) | <b>.002</b>     | 1.39 (1.00-1.94)     | .053            |                                   |
|                                      |         | Clinical MI (n=282) | 82 (29.1)  | 3.53 (2.79-4.47) | <b>&lt;.001</b> | 2.91 (2.30-3.69)     | <b>&lt;.001</b> |                                   |
| Hypertension                         | Yes     | No MI (n=2280)      | 364 (16.0) | 1 (ref.)         | --              | 1 (ref.)             | --              | 0.270                             |
|                                      |         | Silent MI (n=121)   | 27 (22.3)  | 1.52 (1.03-2.26) | <b>.036</b>     | 1.16 (0.78-1.72)     | 0.466           |                                   |
|                                      |         | Clinical MI (n=130) | 58 (44.6)  | 3.69 (2.77-4.91) | <b>&lt;.001</b> | 3.51 (2.63-4.66)     | <b>&lt;.001</b> |                                   |
|                                      | No      | No MI (n=6691)      | 453 (7.2)  | 1 (ref.)         | --              | 1 (ref.)             | --              |                                   |
|                                      |         | Silent MI (n=203)   | 26 (14.2)  | 1.95 (1.31-2.90) | <b>.001</b>     | 1.64 (1.10-2.45)     | 0.015           |                                   |
|                                      |         | Clinical MI (n=232) | 46 (22.9)  | 2.90 (2.12-3.96) | <b>&lt;.001</b> | 2.30 (1.68-3.15)     | <b>&lt;.001</b> |                                   |
| Body Mass Index (kg/m <sup>2</sup> ) | ≥25     | No MI (n=5465)      | 615 (11.3) | 1 (ref.)         | --              | 1 (ref.)             | --              | 0.093                             |
|                                      |         | Silent MI (n=227)   | 48 (21.2)  | 1.86 (1.38-2.50) | <b>&lt;.001</b> | 1.42 (1.05-1.91)     | <b>.022</b>     |                                   |
|                                      |         | Clinical MI (n=254) | 92 (36.2)  | 3.61 (2.88-4.52) | <b>&lt;.001</b> | 3.06 (2.44-3.83)     | <b>&lt;.001</b> |                                   |
|                                      | <25     | No MI (n=3138)      | 202 (6.4)  | 1 (ref.)         | --              | 1 (ref.)             | --              |                                   |
|                                      |         | Silent MI (n=78)    | 6 (7.7)    | 1.28 (0.57-2.89) | .554            | 0.97 (0.43-2.19)     | .936            |                                   |
|                                      |         | Clinical MI (n=77)  | 12 (15.6)  | 2.12 (1.17-3.84) | <b>.013</b>     | 1.76 (0.97-3.19)     | .062            |                                   |

|                                  |                |                     |            |                  |                 |                  |                 |       |       |
|----------------------------------|----------------|---------------------|------------|------------------|-----------------|------------------|-----------------|-------|-------|
| <b>Heart rate<br/>(beat/min)</b> | <b>≥ 60</b>    | No MI (n=4432)      | 455 (10.3) | 1 (ref.)         | --              | 1 (ref.)         | --              | 0.815 |       |
|                                  |                | Silent MI (n=162)   | 30 (18.5)  | 1.75 (1.21-2.54) | <b>.003</b>     | 1.40 (0.96-2.03) | .079            |       |       |
|                                  |                | Clinical MI (n=171) | 56 (32.8)  | 3.34 (2.51-4.44) | <b>&lt;.001</b> | 2.97 (2.24-3.95) | <b>&lt;.001</b> |       |       |
|                                  | <b>&lt;60</b>  | No MI (n=4175)      | 363 (8.7)  | 1 (ref.)         | --              | 1 (ref.)         | --              |       |       |
|                                  |                | Silent MI (n=143)   | 24 (16.8)  | 1.93 (1.27-2.93) | <b>.002</b>     | 1.29 (0.85-1.98) | .234            |       |       |
|                                  |                | Clinical MI (n=160) | 48 (30.0)  | 3.54 (2.60-4.82) | <b>&lt;.001</b> | 2.75 (2.02-3.77) | <b>&lt;.001</b> |       |       |
| <b>Smoking</b>                   | <b>Current</b> | No MI (n=1770)      | 245 (13.8) | 1 (ref.)         | --              | 1 (ref.)         | --              |       | 0.076 |
|                                  |                | Silent MI (n=75)    | 16 (21.3)  | 1.69 (1.02-2.80) | <b>.044</b>     | 1.34 (0.80-2.25) | .262            |       |       |
|                                  |                | Clinical MI (n=95)  | 32 (33.7)  | 2.61 (1.79-3.81) | <b>&lt;.001</b> | 2.41 (1.64-3.52) | <b>&lt;.001</b> |       |       |
|                                  | <b>Former</b>  | No MI (n=2800)      | 268 (9.6)  | 1 (ref.)         | --              | 1 (ref.)         | --              |       |       |
|                                  |                | Silent MI (n=96)    | 17 (17.7)  | 1.63 (1.00-2.68) | <b>.051</b>     | 1.23 (0.75-2.03) | .410            |       |       |
|                                  |                | Clinical MI (n=124) | 36 (29.0)  | 3.02 (2.12-4.32) | <b>&lt;.001</b> | 2.52 (1.77-3.60) | <b>&lt;.001</b> |       |       |
|                                  | <b>Never</b>   | No MI (n=4030)      | 305 (7.6)  | 1 (ref.)         | --              | 1 (ref.)         | --              |       |       |
|                                  |                | Silent MI (n=134)   | 21 (15.7)  | 2.19 (1.40-3.42) | <b>&lt;.001</b> | 1.68 (1.07-2.63) | <b>.023</b>     |       |       |
|                                  |                | Clinical MI (n=111) | 36 (32.4)  | 4.66 (3.26-6.65) | <b>&lt;.001</b> | 3.95 (2.77-5.65) | <b>&lt;.001</b> |       |       |

HR=hazard ratio; CI=confidence interval; MI= myocardial infarction

\*Model 1 adjusted for age, sex, and race (Subgroup used in stratification is not included in the model).

†Model 2 adjusted for variables in model 1 plus body mass index, smoking status, heart rate, systolic blood pressure, blood pressure lowering medications, and diabetes mellitus (Subgroup used in stratification is not included in the model).

†† Based on model 2
